# Supplementary material for: Unique Morphometric Features of the Cerebellum and Cerebellocerebral Structural Correlation Between Autism Spectrum Disorder and Schizophrenia
Source: PubMed Central journal article supplement — Biol Psychiatry Glob Open Sci. 2021 Jun 5;1(3):219–28. doi: 10.1016/j.bpsgos.2021.05.010 (PMC9616290; doi:10.1016/j.bpsgos.2021.05.010), 2021-06-05
Supplement: mmc1.pdf [file mmc1.pdf]

# Unique Morphometric Features of the Cerebellum and Cerebellocerebral Structural Correlation Between Autism Spectrum Disorder and Schizophrenia

## *Supplementary Information*

### Contents

|                                                                                                                               |   |
|-------------------------------------------------------------------------------------------------------------------------------|---|
| Figure S1. Structural correlations between the cerebellar lobular volumes and cerebral cortical thickness.....                | 2 |
| Figure S2. Structural correlations between the cerebellar lobular volumes and subcortical volumes.....                        | 3 |
| Figure S3. Structural correlations between the cerebellar lobular volumes and cerebral white matter volumes.....              | 4 |
| Figure S4. Structural correlations between the cerebellar vermal volumes and cerebral volumes.....                            | 5 |
| Table S1. The statistical results of all cerebellar lobular volumes.....                                                      | 6 |
| Table S2. The results of multiple regression analysis between cerebellar lobular volumes and ADI-R/PANSS subscale scores..... | 7 |
| Table S3. Regions with remarkable correlations in cerebellocerebral structural analysis. ....                                 | 8 |

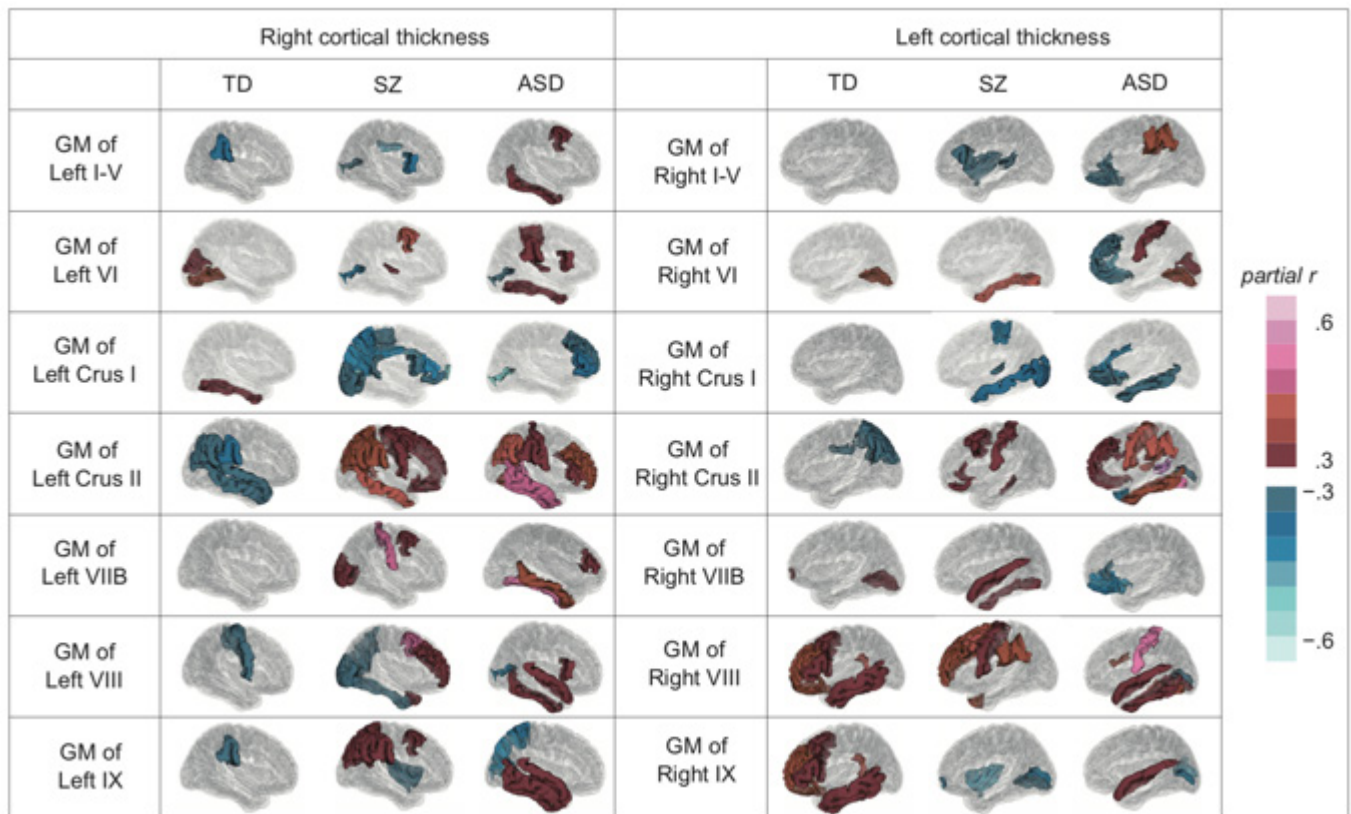

**Figure S1.** Structural correlations between the cerebellar lobular volumes and cerebral cortical thickness. Correlations with the absolute value of *partial r* higher than 0.3 are demonstrated in color maps. TD, typically developing; SZ, schizophrenia; ASD, autism spectrum disorder; GM, gray matter.

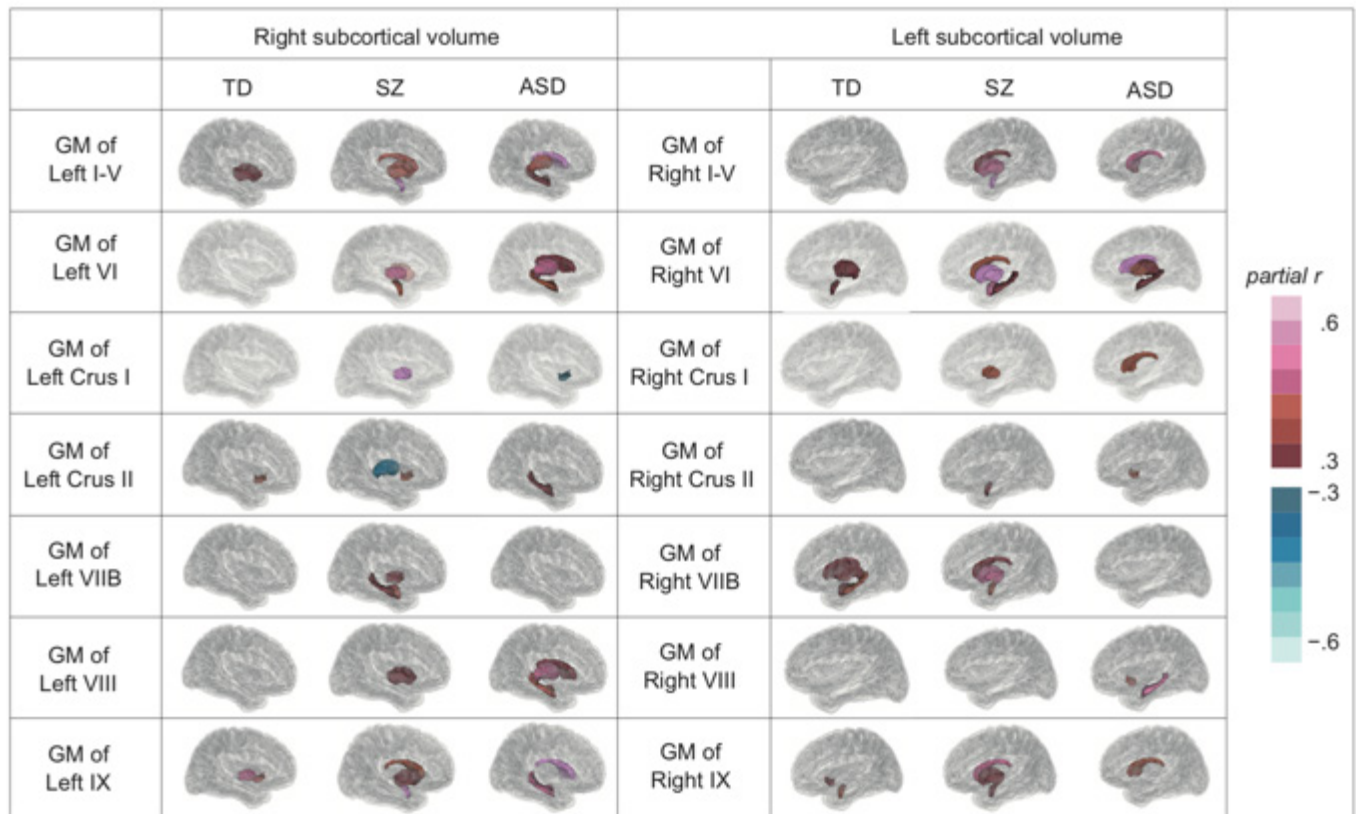

**Figure S2.** Structural correlations between the cerebellar lobular volumes and subcortical volumes. Correlations with the absolute value of *partial r* higher than 0.3 are demonstrated in color maps. TD, typically developing; SZ, schizophrenia; ASD, autism spectrum disorder; GM, gray matter.

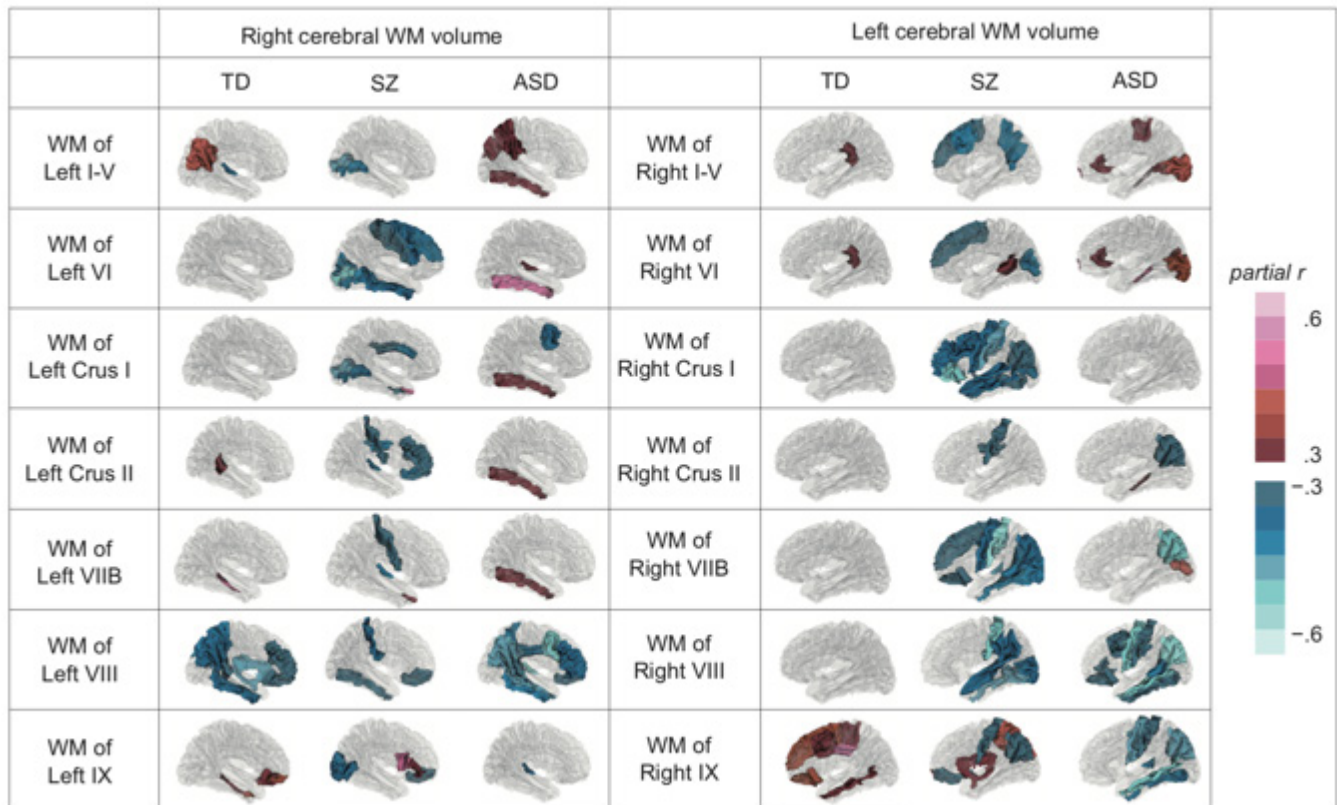

**Figure S3.** Structural correlations between the cerebellar lobular volumes and cerebral white matter volumes. Correlations with the absolute value of *partial r* higher than 0.3 are demonstrated in color maps. TD, typically developing; SZ, schizophrenia; ASD, autism spectrum disorder; WM, white matter.

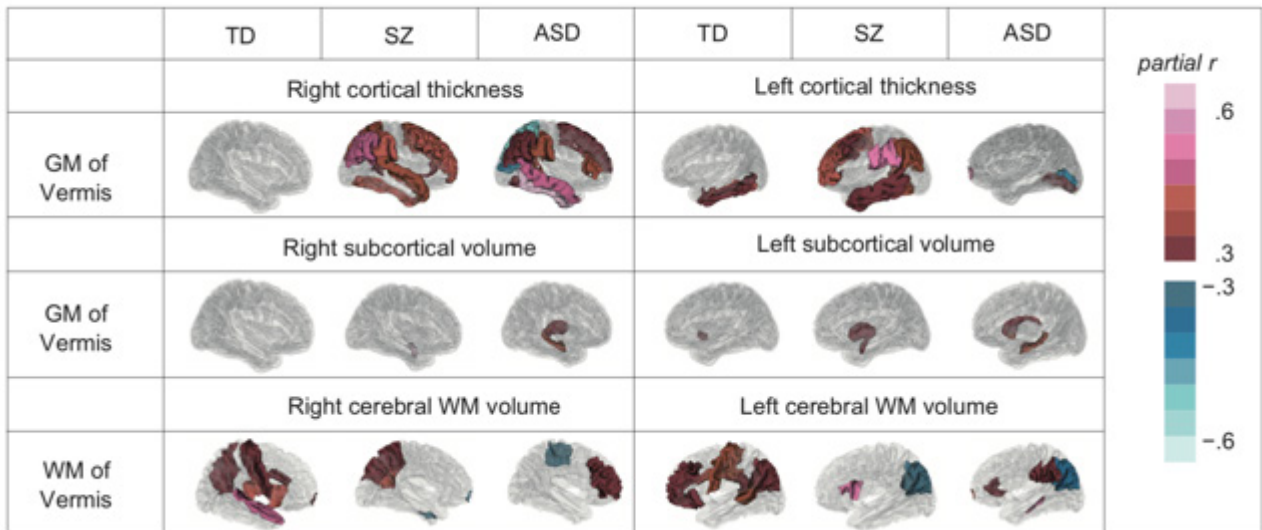

**Figure S4.** Structural correlations between the cerebellar vermal volumes and cerebral volumes.

Correlations with the absolute value of *partial r* higher than 0.3 are demonstrated in color maps. TD, typically developing; SZ, schizophrenia; ASD, autism spectrum disorder; GM, gray matter; WM, white matter.

**Table S1.** The statistical results of all cerebellar lobular volumes.

|                        | TD          | SZ          | ASD         | <i>p</i> -value <sup>†</sup> |
|------------------------|-------------|-------------|-------------|------------------------------|
| GM of left I-V         | 7515 ± 119  | 7315 ± 157  | 7214 ± 149  | .264                         |
| GM of right I-V        | 7591 ± 121  | 7486 ± 161  | 7371 ± 152  | .527                         |
| GM of left VI          | 8006 ± 177  | 7600 ± 234  | 7866 ± 222  | .388                         |
| GM of right VI         | 7706 ± 176  | 7522 ± 233  | 7493 ± 221  | .703                         |
| GM of left Crus I      | 10516 ± 205 | 10407 ± 271 | 10098 ± 258 | .443                         |
| GM of right Crus I     | 11524 ± 221 | 11299 ± 292 | 10552 ± 277 | .024                         |
| GM of left Crus II     | 6159 ± 157  | 6304 ± 208  | 5764 ± 197  | .141                         |
| GM of right Crus II    | 7016 ± 174  | 6805 ± 230  | 6585 ± 218  | .303                         |
| GM of left VIIB        | 4428 ± 106  | 4337 ± 140  | 4291 ± 133  | .412                         |
| GM of right VIIB       | 4459 ± 98   | 4543 ± 130  | 4244 ± 124  | .220                         |
| GM of left VIII        | 8198 ± 131  | 8059 ± 174  | 8054 ± 165  | .727                         |
| GM of right VIII       | 6300 ± 94   | 6262 ± 124  | 6207 ± 118  | .827                         |
| GM of left IX          | 3277 ± 95   | 3027 ± 125  | 3203 ± 119  | .285                         |
| GM of right IX         | 3255 ± 86   | 2965 ± 114  | 3235 ± 108  | .106                         |
| GM of posterior vermis | 4946 ± 76   | 4815 ± 101  | 4799 ± 96   | .402                         |
| WM of left I-V         | 1673 ± 49   | 1745 ± 65   | 1851 ± 62   | .087                         |
| WM of right I-V        | 1702 ± 49   | 1788 ± 65   | 1912 ± 62   | .032                         |
| WM of left VI          | 1559 ± 61   | 1553 ± 80   | 1911 ± 76   | <.001                        |
| WM of right VI         | 1576 ± 66   | 1722 ± 88   | 2045 ± 83   | <.001                        |
| WM of left Crus I      | 2242 ± 97   | 2060 ± 129  | 2790 ± 122  | <.001                        |
| WM of right Crus I     | 2819 ± 110  | 2551 ± 145  | 3397 ± 138  | <.001                        |
| WM of left Crus II     | 1248 ± 66   | 1142 ± 87   | 1435 ± 83   | .049                         |
| WM of right Crus II    | 1689 ± 91   | 1382 ± 120  | 1948 ± 114  | .004                         |
| WM of left VIIB        | 950 ± 49    | 817 ± 65    | 996 ± 62    | .123                         |
| WM of right VIIB       | 970 ± 43    | 817 ± 57    | 1089 ± 54   | .003                         |
| WM of left VIII        | 1635 ± 62   | 1516 ± 82   | 1756 ± 78   | .111                         |
| WM of right VIII       | 1262 ± 59   | 1158 ± 78   | 1421 ± 74   | .052                         |
| WM of left IX          | 576 ± 34    | 437 ± 45    | 595 ± 42    | .020                         |
| WM of right IX         | 612 ± 38    | 455 ± 50    | 632 ± 47    | .020                         |
| WM of posterior vermis | 752 ± 31    | 683 ± 42    | 792 ± 39    | .165                         |

TD, typically developing; SZ, schizophrenia; ASD, autism spectrum disorder; GM, gray matter; WM, white matter.

<sup>†</sup>*p*-values were uncorrected.

**Table S2.** The results of multiple regression analysis between cerebellar lobular volumes and ADI-R/PANSS subscale scores.

|                        | ASD                           |               |                                    | SZ                |                   |                         |
|------------------------|-------------------------------|---------------|------------------------------------|-------------------|-------------------|-------------------------|
|                        | Reciprocal social interaction | Communication | Repetitive & stereotyped behaviors | Positive symptoms | Negative symptoms | General psychopathology |
| WM of left I-V         | .025                          | .044          | .283                               | .023              | .347              | .085                    |
| WM of right I-V        | .129                          | .096          | .142                               | .124              | .4536             | .288                    |
| WM of left VI          | .316                          | .322          | .349                               | .416              | .033              | .064                    |
| WM of right VI         | .323                          | .363          | .479**                             | .527*             | .208              | .277                    |
| WM of left Crus I      | .098                          | -.011         | .097                               | .351              | .195              | .399                    |
| WM of right Crus I     | .022                          | .134          | .198                               | .346              | .301              | .266                    |
| WM of left Crus II     | -.107                         | .040          | .038                               | -.049             | -.007             | .092                    |
| WM of right Crus II    | -.082                         | -.026         | -.014                              | .228              | -.009             | .150                    |
| WM of left VIIB        | -.186                         | -.085         | -.058                              | .007              | -.043             | .073                    |
| WM of right VIIB       | -.174                         | .090          | .050                               | .037              | .185              | .190                    |
| WM of left VIII        | .040                          | .227          | .333                               | -.160             | -.255             | -.090                   |
| WM of right VIII       | .104                          | .212          | .348                               | .412              | .320              | .435*                   |
| WM of left IX          | .163                          | .264          | .395*                              | .335              | .062              | .188                    |
| WM of right IX         | .078                          | .141          | .260                               | .451*             | .250              | .242                    |
| WM of posterior vermis | .065                          | .051          | .152                               | .049              | -.250             | -.094                   |
| GM of left I-V         | .046                          | .140          | .254                               | -.333             | -.158             | -.168                   |
| GM of right I-V        | .056                          | .066          | -.013                              | -.102             | -.148             | .026                    |
| GM of left VI          | .214                          | .196          | .051                               | -.378             | -.280             | -.301                   |
| GM of right VI         | .202                          | .191          | .154                               | -.200             | -.168             | -.113                   |
| GM of left Crus I      | .300                          | .270          | .291                               | -.341             | -.032             | -.038                   |
| GM of right Crus I     | .220                          | .266          | .411*                              | -.621**           | -.105             | -.308                   |
| GM of left Crus II     | .248                          | .172          | .023                               | -.217             | -.215             | -.266                   |
| GM of right Crus II    | .300                          | .130          | -.132                              | -.203             | -.239             | -.109                   |
| GM of left VIIB        | .157                          | -.020         | -.196                              | -.161             | -.068             | .040                    |
| GM of right VIIB       | -.216                         | -.047         | -.150                              | -.333             | -.148             | -.178                   |
| GM of left VIII        | .040                          | .017          | .094                               | -.278             | -.138             | -.221                   |
| GM of right VIII       | .017                          | .043          | .008                               | -.370             | .019              | -.100                   |
| GM of left IX          | .350                          | .349          | .164                               | -.153             | -.310             | -.199                   |
| GM of right IX         | .408*                         | .328          | .173                               | -.037             | -.191             | -.190                   |
| GM of posterior vermis | .022                          | .093          | -.066                              | -.344             | -.252             | -.091                   |

\*  $p < .05$ , \*\*  $p < .01$ 

The values show standardized partial regression coefficients.

ADI-R, the Autism Diagnostic Interview-Revised; PANSS, the Positive and Negative Scale; ASD, autism spectrum disorders; SZ, schizophrenia; WM, white matter; GM, gray matter

**Table S3.** Regions with remarkable correlations in cerebellocerebral structural analysis.

| ASD                                                     |                  |                 |
|---------------------------------------------------------|------------------|-----------------|
|                                                         | <i>Partial r</i> | <i>p</i> -value |
| GM of left I-V — Right Caudate                          | .586             | <.001           |
| GM of right Crus II — Left bankssts thickness           | .580             | <.001           |
| GM of left IX — Right-Caudate                           | .593             | <.001           |
| WM of right I-V — WM of left para hippocampal volume    | .606             | <.001           |
| WM of left VIII — WM of right caudal anterior cingulate | -.583            | <.001           |
| WM of right VIII — WM of left inferior parietal volume  | -.590            | <.001           |
| GM of Vermis — Right inferior temporal thickness        | .700             | <.001           |
| SZ                                                      |                  |                 |
|                                                         | <i>Partial r</i> | <i>p</i> -value |
| GM of left I-V — Right Pallidum                         | .570             | .002            |
| GM of left I-V — Right Amygdala                         | .600             | .001            |
| GM of right I-V — Left Amygdala                         | .590             | .001            |
| GM of left IX — Right Amygdala                          | .599             | .001            |
| GM of right IX — Left Pallidum                          | .546             | .004            |
| GM of Vermis — Right Amygdala                           | .624             | <.001           |
| TD                                                      |                  |                 |
|                                                         | <i>Partial r</i> | <i>p</i> -value |
| GM of Left IX — Right Pallidum                          | .500             | <.001           |
| WM of Left VIIB — WM of right para hippocampal volume   | .500             | <.001           |
| WM of Right IX — WM of left posterior cingulate volume  | .507             | <.001           |
| WM of Vermis — WM of right superior temporal volume     | .494             | <.001           |

TD, typically developing; SZ, schizophrenia; ASD, autism spectrum disorder; GM, gray matter; WM, white matter.
